# Supplementary material for: The clinical diagnostic value of right-to-left shunt in cryptogenic stroke under right heart contrast echocardiography: a retrospective case-control study
Source: PubMed Central journal article supplement — Cardiovasc Diagn Ther. 2024 Dec 19;14(6):1048–57. doi: 10.21037/cdt-24-288 (PMC11707468; doi:10.21037/cdt-24-288), 2024-12-19
Supplement: cdt-14-06-1048-dss.pdf [file cdt-14-06-1048-dss.pdf]

## Data Sharing Statement

|                     |                                                                                                                                                     |                                                                                                                                                                                                                                                             |
|---------------------|-----------------------------------------------------------------------------------------------------------------------------------------------------|-------------------------------------------------------------------------------------------------------------------------------------------------------------------------------------------------------------------------------------------------------------|
| <b>Article Info</b> | <a href="https://dx.doi.org/10.21037/cdt-24-288">https://dx.doi.org/10.21037/cdt-24-288</a>                                                         |                                                                                                                                                                                                                                                             |
| <b>Item</b>         | <b>Question</b>                                                                                                                                     | <b>Authors' Response<br/>(place "-" if not applicable)</b>                                                                                                                                                                                                  |
| 1                   | Would you like to share data collected for your study to others?                                                                                    | Yes.                                                                                                                                                                                                                                                        |
| 2                   | If not, would you like to share the reason for your decision?                                                                                       | -                                                                                                                                                                                                                                                           |
| 3                   | What data in particular will be shared?                                                                                                             | RLS grade and RLS type are significantly correlated with the occurrence of CS. As an auxiliary means of CS diagnosis, RLS grade can effectively reduce the misdiagnosis rate of CS, which is of great clinical significance for early detection of CS risk. |
| 4                   | Any other documents will be shared? Such as study protocol, statistical analysis plan, informed consent form, clinical study report, analytic code. | Statistical analysis plan, informed consent form, and clinical study report will also be shared if requested.                                                                                                                                               |
| 5                   | When will data availability begin?                                                                                                                  | From the publication date.                                                                                                                                                                                                                                  |
| 6                   | When will data availability end?                                                                                                                    | Two years within the publication date, since the technique may be updated over time.                                                                                                                                                                        |
| 7                   | To whom will you share the data?                                                                                                                    | Cardiovascular physician.                                                                                                                                                                                                                                   |
| 8                   | For what type of analysis or purpose?                                                                                                               | For evaluation on RLS indexes and the occurrence of cryptogenic stroke (CS) and its clinical diagnostic value in CS.                                                                                                                                        |
| 9                   | How or where can the data/documents be obtained?                                                                                                    | Emails could be sent to the address below to obtain the shared data:<br>dongxu20222027@163.com.                                                                                                                                                             |
| 10                  | Any other restrictions?                                                                                                                             | We may balance the potential benefits and risks for each request and then provide the data that could be shared.                                                                                                                                            |
